# Supplementary material for: SNPs in the COX-2/PGES/EP signaling pathway are associated with risk of severe capecitabine-induced hand-foot syndrome
Source: Springer Nature journal article supplement (doi:10.1007/s00280-020-04053-9), 2020-03-19
Supplement: MOESM1 [file 17815272]

**Supplementary Table 1. Association between 19 SNPs and grade 2/3 HFS**

| Polymorphisms  and Genotypes | No. of Patients | No. of  Events（%） | *P* | *P*c |
| --- | --- | --- | --- | --- |
| COX-2：rs5275 |  |  |  |  |
| TT | 151 | 28(18.5) |  |  |
| TC/CC | 63 | 9(14.3) | 0.453 | 0.778 |
| COX-2：rs5277 |  |  |  |  |
| GG | 203 | 35(17.2) |  |  |
| GC/CC | 16 | 4(25.0) | 0.435 | 0.778 |
| COX-2：rs689470 |  |  |  |  |
| CC | 215 | 37(17.2) | NA | NA |
| CT | 6 | 0(0) |  |  |
| COX-2：rs2745557 |  |  |  |  |
| GG | 206 | 36(17.5) |  |  |
| AG | 15 | 2(13.3) | 0.681 | 0.778 |
| COX-2：rs20417 |  |  |  |  |
| GG | 216 | 36(16.7) |  |  |
| CC | 2 | 0(0) | NA | NA |
| COX-2：rs3218625 |  |  |  |  |
| GG | 210 | 35(16.7) |  |  |
| GA | 10 | 2(20.0) | 0.783 | 0.835 |
| EP1: rs3810255 |  |  |  |  |
| AA | 74 | 5(6.8) |  |  |
| AG/GG | 131 | 33(23.4) | 0.002 | **0.032** |
| EP2: rs17197 |  |  |  |  |
| TT | 76 | 10(13.2) |  |  |
| TC/CC | 146 | 28(19.2) | 0.258 | 0.778 |
| EP2: rs708494 |  |  |  |  |
| CC | 114 | 20(17.5) |  |  |
| TC/TT | 104 | 16(15.4) | 0.668 | 0.778 |
| EP3: rs5702 |  |  |  |  |
| CC | 116 | 17(14.7) |  |  |
| TC/TT | 103 | 20(19.4) | 0.348 | 0.778 |
| EP3: rs1325949 |  |  |  |  |
| AA | 123 | 19(15.4) |  |  |
| AG/GG | 97 | 18(18.6) | 0.540 | 0.778 |
| EP3: rs7543182 |  |  |  |  |
| CC | 125 | 20(16.0) |  |  |
| AC/AA | 95 | 18(18.9) | 0.567 | 0.778 |
| EP3: rs7555874 |  |  |  |  |
| CC | 128 | 20(15.6) |  |  |
| CT/TT | 95 | 18(18.9) | 0.514 | 0.778 |
| EP3: rs4147114 |  |  |  |  |
| GG | 56 | 8(14.3) |  |  |
| GC/CC | 165 | 29(17.6) | 0.569 | 0.778 |
| Near EP3:rs17131450 |  |  |  |  |
| GG | 170 | 34(20.0) |  |  |
| AG/AA | 49 | 3(6.1) | 0.022 | **0.176** |
| EP4: rs4495224 |  |  |  |  |
| CC | 113 | 19(16.8) |  |  |
| CA/AA | 107 | 18(16.8) | 0.999 | 0.999 |
| EP4: rs7720838 |  |  |  |  |
| GG | 125 | 23(18.4) |  |  |
| GT/TT | 95 | 14(14.7) | 0.472 | 0.778 |
| PGES: rs1098788 |  |  |  |  |
| AA | 163 | 29(17.8) |  |  |
| TA/TT | 54 | 8(14.8) | 0.614 | 0.778 |
| PGES: rs13283456 |  |  |  |  |
| CC | 217 | 38(17.5) |  |  |
| TC/TT | 0 | 0(0) | NA | NA |

NA: not applicable

*P*c: *P*-value corrected by Benjamini and Hochberg False Discovery Rate correction. Results in bold are *P*-values claimed statistically significant using Benjamini-Hochberg procedure with FDR=0.2.
